# Supplementary material for: Association of COVID-19 Vaccination During Pregnancy With Incidence of SARS-CoV-2 Infection in Infants
Source: PubMed Central journal article supplement (PMC9161123; doi:10.1001/jamainternmed.2022.2442), 2022-06-01

## Supplemental Online Content

Carlsen EO, Magnus MC, Oakley L, et al. Association of COVID-19 vaccination during pregnancy with incidence of SARS-CoV-2 infection in infants. *JAMA Intern Med*. Published online June 1, 2022. doi:10.1001/jamainternmed.2022.2442

**eTable 1.** Sensitivity analysis excluding infants born to women with Covid-19 prior to birth

**eTable 2.** Sensitivity analysis of term-born infants

**eTable 3.** Sensitivity analysis of infants born after a pregnancy conceived at least 42 gestational weeks prior to February 28, 2022

**eTable 4.** Sensitivity analysis of infants born to a Scandinavian-born woman

**eTable 5.** Sensitivity analysis of infants born to first-time mothers

**eTable 6.** Sensitivity analysis excluding infants born to women whose first vaccination dose was a non-mRNA vaccine

**eTable 7.** Sensitivity analysis starting follow-up time on January 15, 2022

**eTable 8.** Sensitivity analysis using the age of the child as time-axis

**eTable 9.** Sensitivity analysis including infants born to women who received only one mRNA vaccine dose during pregnancy

**eTable 10.** Sensitivity analysis stratifying by second and third vaccine dose in pregnancy

**eFigure 1.** Distributions by maternal vaccination status

**eFigure 2.** Cumulative proportion of infants with a positive SARS-CoV-2 test by maternal vaccination and infant age

**eFigure 3.** Calendar date of last vaccine dose in pregnancy

**eFigure 4.** Time between birth and last vaccine dose in pregnancy

This supplemental material has been provided by the authors to give readers additional information about their work.

**eTable 1: Sensitivity analysis excluding infants born to women with a positive SARS-CoV-2 PCR-test up to 14 days prior to giving birth.** Number of infants included: 20,244. Time was included as an interaction term for the two time periods in the unadjusted and adjusted analyses.

|                     | Before January 1, 2022 |                      |                                 |                                                |                                  |                                             | After January 1, 2022  |                      |                                 |                                                |                                  |                                             |
|---------------------|------------------------|----------------------|---------------------------------|------------------------------------------------|----------------------------------|---------------------------------------------|------------------------|----------------------|---------------------------------|------------------------------------------------|----------------------------------|---------------------------------------------|
|                     | Live-born infants, No. | Follow-up time, days | Covid-19 positive test, No. (%) | Incidence rate, cases/10,000 days of follow-up | Unadjusted hazard ratio (95% CI) | Adjusted hazard ratio <sup>a</sup> (95% CI) | Live-born infants, No. | Follow-up time, days | Covid-19 positive test, No. (%) | Incidence rate, cases/10,000 days of follow-up | Unadjusted hazard ratio (95% CI) | Adjusted hazard ratio <sup>a</sup> (95% CI) |
| <b>Unvaccinated</b> | 9177                   | 456298               | 144 (1.6)                       | 3.2                                            | Reference                        | Reference                                   | 5850                   | 271506               | 314 (5.4)                       | 11.6                                           | Reference                        | Reference                                   |
| <b>Vaccinated</b>   | 4669                   | 206199               | 25 (0.5)                        | 1.2                                            | 0.27 (0.18 to 0.41)              | 0.28 (0.18 to 0.43)                         | 9253                   | 526832               | 380 (4.1)                       | 7.2                                            | 0.61 (0.52 to 0.71)              | 0.64 (0.54 to 0.76)                         |

<sup>a</sup> Adjusted for maternal age, maternal parity, maternal country of birth, maternal educational attainment as of 2019, and county of residence.

**eTable 2: Sensitivity analysis of term births only, excluding infants born before 37 gestational weeks.** Number of infants included: 20,423. Time was included as an interaction term for the two time periods in the unadjusted and adjusted analyses.

|                     | Before January 1, 2022 |                      |                                 |                                                |                                  |                                             | After January 1, 2022  |                      |                                 |                                                |                                  |                                             |
|---------------------|------------------------|----------------------|---------------------------------|------------------------------------------------|----------------------------------|---------------------------------------------|------------------------|----------------------|---------------------------------|------------------------------------------------|----------------------------------|---------------------------------------------|
|                     | Live-born infants, No. | Follow-up time, days | Covid-19 positive test, No. (%) | Incidence rate, cases/10,000 days of follow-up | Unadjusted hazard ratio (95% CI) | Adjusted hazard ratio <sup>a</sup> (95% CI) | Live-born infants, No. | Follow-up time, days | Covid-19 positive test, No. (%) | Incidence rate, cases/10,000 days of follow-up | Unadjusted hazard ratio (95% CI) | Adjusted hazard ratio <sup>a</sup> (95% CI) |
| <b>Unvaccinated</b> | 9261                   | 461794               | 139 (1.5)                       | 3.0                                            | Reference                        | Reference                                   | 6370                   | 302516               | 338 (5.3)                       | 11.2                                           | Reference                        | Reference                                   |
| <b>Vaccinated</b>   | 4414                   | 194576               | 24 (0.5)                        | 1.2                                            | 0.29 (0.19 to 0.45)              | 0.30 (0.19 to 0.47)                         | 9026                   | 514639               | 364 (4.0)                       | 7.1                                            | 0.62 (0.53 to 0.72)              | 0.67 (0.56 to 0.79)                         |

<sup>a</sup> Adjusted for maternal age, maternal parity, maternal country of birth, maternal educational attainment as of 2019, and county of residence.

**eTable 3: Sensitivity analysis of infants conceived at least 42 weeks prior to end of inclusion to avoid oversampling of short pregnancies.** Number of infants included: 19,495. Time was included as an interaction term for the two time periods in the unadjusted and adjusted analyses.

|                     | Before January 1, 2022 |                      |                                 |                                                |                                  |                                             | After January 1, 2022  |                      |                                 |                                                |                                  |                                             |
|---------------------|------------------------|----------------------|---------------------------------|------------------------------------------------|----------------------------------|---------------------------------------------|------------------------|----------------------|---------------------------------|------------------------------------------------|----------------------------------|---------------------------------------------|
|                     | Live-born infants, No. | Follow-up time, days | Covid-19 positive test, No. (%) | Incidence rate, cases/10,000 days of follow-up | Unadjusted hazard ratio (95% CI) | Adjusted hazard ratio <sup>a</sup> (95% CI) | Live-born infants, No. | Follow-up time, days | Covid-19 positive test, No. (%) | Incidence rate, cases/10,000 days of follow-up | Unadjusted hazard ratio (95% CI) | Adjusted hazard ratio <sup>a</sup> (95% CI) |
| <b>Unvaccinated</b> | 9743                   | 485567               | 146 (1.5)                       | 3.0                                            | Reference                        | Reference                                   | 6178                   | 296278               | 332 (5.4)                       | 11.2                                           | Reference                        | Reference                                   |
| <b>Vaccinated</b>   | 4690                   | 206715               | 25 (0.5)                        | 1.2                                            | 0.29 (0.19 to 0.44)              | 0.30 (0.19 to 0.46)                         | 8024                   | 476946               | 360 (4.5)                       | 7.5                                            | 0.65 (0.56 to 0.76)              | 0.70 (0.59 to 0.84)                         |

<sup>a</sup> Adjusted for maternal age, maternal parity, maternal country of birth, maternal educational attainment as of 2019, and county of residence.

**eTable 4: Sensitivity analysis of infants born to a Scandinavian-born woman.** Number of infants included: 15,701. Time was included as an interaction term for the two time periods in the unadjusted and adjusted analyses.

|                     | Before January 1, 2022 |                      |                                 |                                                |                                  |                                             | After January 1, 2022  |                      |                                 |                                                |                                  |                                             |
|---------------------|------------------------|----------------------|---------------------------------|------------------------------------------------|----------------------------------|---------------------------------------------|------------------------|----------------------|---------------------------------|------------------------------------------------|----------------------------------|---------------------------------------------|
|                     | Live-born infants, No. | Follow-up time, days | Covid-19 positive test, No. (%) | Incidence rate, cases/10,000 days of follow-up | Unadjusted hazard ratio (95% CI) | Adjusted hazard ratio <sup>a</sup> (95% CI) | Live-born infants, No. | Follow-up time, days | Covid-19 positive test, No. (%) | Incidence rate, cases/10,000 days of follow-up | Unadjusted hazard ratio (95% CI) | Adjusted hazard ratio <sup>a</sup> (95% CI) |
| <b>Unvaccinated</b> | 6231                   | 293624               | 56 (0.9)                        | 1.9                                            | Reference                        | Reference                                   | 3236                   | 141039               | 163 (5.0)                       | 11.6                                           | Reference                        | Reference                                   |
| <b>Vaccinated</b>   | 4066                   | 180914               | 20 (0.5)                        | 1.1                                            | 0.40 (0.24 to 0.67)              | 0.40 (0.24 to 0.68)                         | 8333                   | 473508               | 348 (4.2)                       | 7.3                                            | 0.60 (0.50 to 0.73)              | 0.64 (0.52 to 0.78)                         |

<sup>a</sup> Adjusted for maternal age, maternal parity, maternal country of birth, maternal educational attainment as of 2019, and county of residence.

**eTable 5: Sensitivity analysis of infants born to a primiparous woman.** Number of infants included: 9349. Time was included as an interaction term for the two time periods in the unadjusted and adjusted analyses.

|                     | Before January 1, 2022 |                      |                                 |                                                |                                  |                                             | After January 1, 2022  |                      |                                 |                                                |                                  |                                             |
|---------------------|------------------------|----------------------|---------------------------------|------------------------------------------------|----------------------------------|---------------------------------------------|------------------------|----------------------|---------------------------------|------------------------------------------------|----------------------------------|---------------------------------------------|
|                     | Live-born infants, No. | Follow-up time, days | Covid-19 positive test, No. (%) | Incidence rate, cases/10,000 days of follow-up | Unadjusted hazard ratio (95% CI) | Adjusted hazard ratio <sup>a</sup> (95% CI) | Live-born infants, No. | Follow-up time, days | Covid-19 positive test, No. (%) | Incidence rate, cases/10,000 days of follow-up | Unadjusted hazard ratio (95% CI) | Adjusted hazard ratio <sup>a</sup> (95% CI) |
| <b>Unvaccinated</b> | 4103                   | 198332               | 37 (0.9)                        | 1.9                                            | Reference                        | Reference                                   | 2642                   | 124631               | 111 (4.2)                       | 8.9                                            | Reference                        | Reference                                   |
| <b>Vaccinated</b>   | 2177                   | 93689                | 5 (0.2)                         | 0.5                                            | 0.19 (0.08 to 0.49)              | 0.21 (0.08 to 0.55)                         | 4387                   | 248967               | 110 (2.5)                       | 4.4                                            | 0.47 (0.36 to 0.62)              | 0.54 (0.40 to 0.73)                         |

<sup>a</sup> Adjusted for maternal age, maternal parity, maternal country of birth, maternal educational attainment as of 2019, and county of residence.

**eTable 6: Sensitivity analysis excluding infants born to vaccinated women who received the Oxford-AstraZeneca vaccine (ChAdOx1 nCoV-19) as their first vaccine dose.<sup>a</sup>** Number of infants included: 21,083. Time was included as an interaction term for the two time periods in the unadjusted and adjusted analyses.

|                     | Before January 1, 2022 |                      |                                 |                                                |                                  |                                             | After January 1, 2022  |                      |                                 |                                                |                                  |                                             |
|---------------------|------------------------|----------------------|---------------------------------|------------------------------------------------|----------------------------------|---------------------------------------------|------------------------|----------------------|---------------------------------|------------------------------------------------|----------------------------------|---------------------------------------------|
|                     | Live-born infants, No. | Follow-up time, days | Covid-19 positive test, No. (%) | Incidence rate, cases/10,000 days of follow-up | Unadjusted hazard ratio (95% CI) | Adjusted hazard ratio <sup>b</sup> (95% CI) | Live-born infants, No. | Follow-up time, days | Covid-19 positive test, No. (%) | Incidence rate, cases/10,000 days of follow-up | Unadjusted hazard ratio (95% CI) | Adjusted hazard ratio <sup>b</sup> (95% CI) |
| <b>Unvaccinated</b> | 9759                   | 485967               | 146 (1.5)                       | 3.0                                            | Reference                        | Reference                                   | 6728                   | 320292               | 350 (5.2)                       | 10.9                                           | Reference                        | Reference                                   |
| <b>Vaccinated</b>   | 4477                   | 200158               | 24 (0.5)                        | 1.2                                            | 0.28 (0.18 to 0.44)              | 0.29 (0.19 to 0.46)                         | 9074                   | 517800               | 372 (4.1)                       | 7.2                                            | 0.64 (0.56 to 0.75)              | 0.68 (0.58 to 0.81)                         |

<sup>a</sup> Exclusion of 380 infants whose mother's first vaccine dose was Oxford-AstraZeneca vaccine (ChAdOx1-S), but the second was an mRNA vaccine.

<sup>b</sup> Adjusted for maternal age, maternal parity, maternal country of birth, maternal educational attainment as of 2019, and county of residence.

**eTable 7: Sensitivity analysis restricting follow-up time to start on January 15, 2022.** Number of infants included: 15,230.

|                     | <b>After January 1, 2022</b>  |                             |                                        |                                                       |                                         |                                                    |
|---------------------|-------------------------------|-----------------------------|----------------------------------------|-------------------------------------------------------|-----------------------------------------|----------------------------------------------------|
|                     | <b>Live-born infants, No.</b> | <b>Follow-up time, days</b> | <b>Covid-19 positive test, No. (%)</b> | <b>Incidence rate, cases/10,000 days of follow-up</b> | <b>Unadjusted hazard ratio (95% CI)</b> | <b>Adjusted hazard ratio <sup>a</sup> (95% CI)</b> |
| <b>Unvaccinated</b> | 5808                          | 253616                      | 299 (5.1)                              | 11.8                                                  | Reference                               | Reference                                          |
| <b>Vaccinated</b>   | 9422                          | 470863                      | 354 (3.8)                              | 7.5                                                   | 0.65 (0.55 to 0.75)                     | 0.59 (0.49 to 0.71)                                |

<sup>a</sup> Adjusted for maternal age, maternal parity, maternal country of birth, maternal educational attainment as of 2019, and county of residence.



**eTable 8: Sensitivity analysis using age of the infant as time axis.** Number of infants included: 21,643. Time was included as an interaction term for the two time periods in the unadjusted and adjusted analyses.

|                     | Before January 1, 2022 |                      |                                 |                                                |                                               |                                             | After January 1, 2022  |                      |                                 |                                                |                                               |                                             |
|---------------------|------------------------|----------------------|---------------------------------|------------------------------------------------|-----------------------------------------------|---------------------------------------------|------------------------|----------------------|---------------------------------|------------------------------------------------|-----------------------------------------------|---------------------------------------------|
|                     | Live-born infants, No. | Follow-up time, days | Covid-19 positive test, No. (%) | Incidence rate, cases/10,000 days of follow-up | Unadjusted hazard ratio (95% CI) <sup>a</sup> | Adjusted hazard ratio <sup>b</sup> (95% CI) | Live-born infants, No. | Follow-up time, days | Covid-19 positive test, No. (%) | Incidence rate, cases/10,000 days of follow-up | Unadjusted hazard ratio (95% CI) <sup>a</sup> | Adjusted hazard ratio <sup>b</sup> (95% CI) |
| <b>Unvaccinated</b> | 9759                   | 485967               | 146 (1.5)                       | 3.0                                            | Reference                                     | Reference                                   | 6728                   | 320292               | 350 (5.2)                       | 10.9                                           | Reference                                     | Reference                                   |
| <b>Vaccinated</b>   | 4696                   | 206857               | 25 (0.5)                        | 1.2                                            | 0.36 (0.24 to 0.56)                           | 0.38 (0.24 to 0.58)                         | 9616                   | 546790               | 385 (4.0)                       | 7.0                                            | 0.68 (0.59 to 0.79)                           | 0.73 (0.62 to 0.87)                         |

<sup>a</sup> Adjusted for week of birth.

<sup>b</sup> Adjusted for week of birth, maternal age, maternal parity, maternal country of birth, maternal educational attainment as of 2019, and county of residence.

**eTable 9: Sensitivity analysis including infants born to vaccinated women who received only one mRNA vaccine dose during the second or third trimester of pregnancy.** Number of infants included: 14,743. Time was included as an interaction term for the two time periods in the unadjusted and adjusted analyses.

|                     | Before January 1, 2022 |                      |                                 |                                                |                                  |                                             | After January 1, 2022  |                      |                                 |                                                |                                  |                                             |
|---------------------|------------------------|----------------------|---------------------------------|------------------------------------------------|----------------------------------|---------------------------------------------|------------------------|----------------------|---------------------------------|------------------------------------------------|----------------------------------|---------------------------------------------|
|                     | Live-born infants, No. | Follow-up time, days | Covid-19 positive test, No. (%) | Incidence rate, cases/10,000 days of follow-up | Unadjusted hazard ratio (95% CI) | Adjusted hazard ratio <sup>a</sup> (95% CI) | Live-born infants, No. | Follow-up time, days | Covid-19 positive test, No. (%) | Incidence rate, cases/10,000 days of follow-up | Unadjusted hazard ratio (95% CI) | Adjusted hazard ratio <sup>a</sup> (95% CI) |
| <b>Unvaccinated</b> | 9759                   | 485967               | 146 (1.5)                       | 3.0                                            | Reference                        | Reference                                   | 6728                   | 320292               | 350 (5.2)                       | 10.9                                           | Reference                        | Reference                                   |
| <b>Vaccinated</b>   | 2215                   | 80546                | <5 (0.1)                        | 0.2                                            | 0.10 (0.02 to 0.41)              | 0.11 (0.03 to 0.43)                         | 1048                   | 44919                | 34 (3.2)                        | 7.6                                            | 0.68 (0.48 to 0.97)              | 0.72 (0.50 to 1.03)                         |

<sup>a</sup> Adjusted for maternal age, maternal parity, maternal country of birth, maternal educational attainment as of 2019, and county of residence.

**eTable 10: Sensitivity analysis stratifying by whether the mother received dose number 2 (n=8915) or 3 in pregnancy (n=824)<sup>a</sup>.** Time was included as an interaction term for the two time periods in the unadjusted and adjusted analyses.

|                                           | Before January 1, 2022 |                      |                                 |                                                |                                  |                                             | After January 1, 2022  |                      |                                 |                                                |                                  |                                             |
|-------------------------------------------|------------------------|----------------------|---------------------------------|------------------------------------------------|----------------------------------|---------------------------------------------|------------------------|----------------------|---------------------------------|------------------------------------------------|----------------------------------|---------------------------------------------|
|                                           | Live-born infants, No. | Follow-up time, days | Covid-19 positive test, No. (%) | Incidence rate, cases/10,000 days of follow-up | Unadjusted hazard ratio (95% CI) | Adjusted hazard ratio <sup>b</sup> (95% CI) | Live-born infants, No. | Follow-up time, days | Covid-19 positive test, No. (%) | Incidence rate, cases/10,000 days of follow-up | Unadjusted hazard ratio (95% CI) | Adjusted hazard ratio <sup>b</sup> (95% CI) |
| <b>Unvaccinated</b>                       | 9759                   | 485967               | 146 (1.5)                       | 3.0                                            | Reference                        | Reference                                   | 6728                   | 320292               | 350 (5.2)                       | 10.9                                           | Reference                        | Reference                                   |
| <b>Vaccinated with dose 2</b>             | 4666                   | 206389               | 25 (0.5)                        | 1.2                                            | 0.29 (0.19 to 0.44)              | 0.29 (0.19 to 0.45)                         | 8792                   | 501255               | 375 (4.3)                       | 7.5                                            | 0.67 (0.57 to 0.77)              | 0.70 (0.59 to 0.83)                         |
| <b>Vaccinated with dose 3<sup>a</sup></b> | 30                     | 468                  | 0 (0)                           | 0                                              | N/A                              | N/A                                         | 824                    | 45535                | 10 (1.2)                        | 2.2                                            | 0.22 (0.11 to 0.41)              | 0.22 (0.12 to 0.43)                         |

<sup>a</sup> Less than 5 women received the fourth dose in pregnancy and their infants are included in the 3-dose stratification.

<sup>b</sup> Adjusted for maternal age, maternal parity, maternal country of birth, maternal educational attainment as of 2019, and county of residence.

**eFigure 1: Distributions according to maternal vaccination status (second/third dose during pregnancy versus none) during the whole time period.**

A) Date of births, B) Date of positive SARS-CoV-2 PCR-test by 4 months of age, C) Age of child in days at the time of first positive SARS-CoV-2 test, D) Date of SARS-CoV-2 PCR-test, regardless of the result of that test.

**A)**

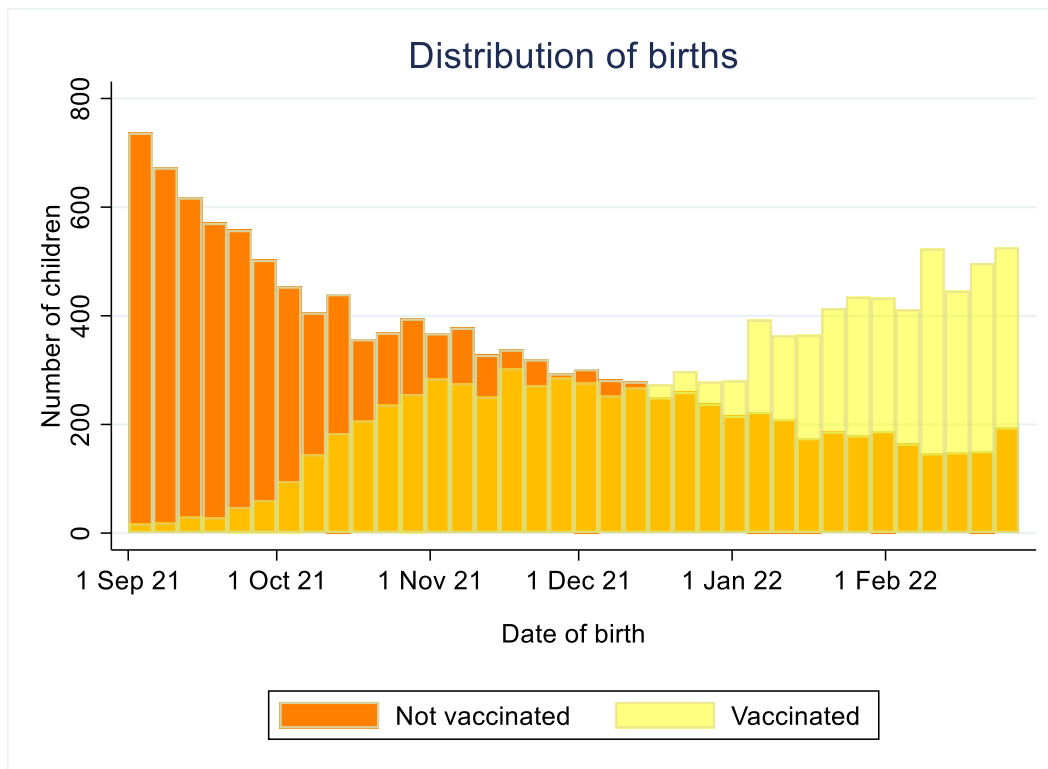

**B)**

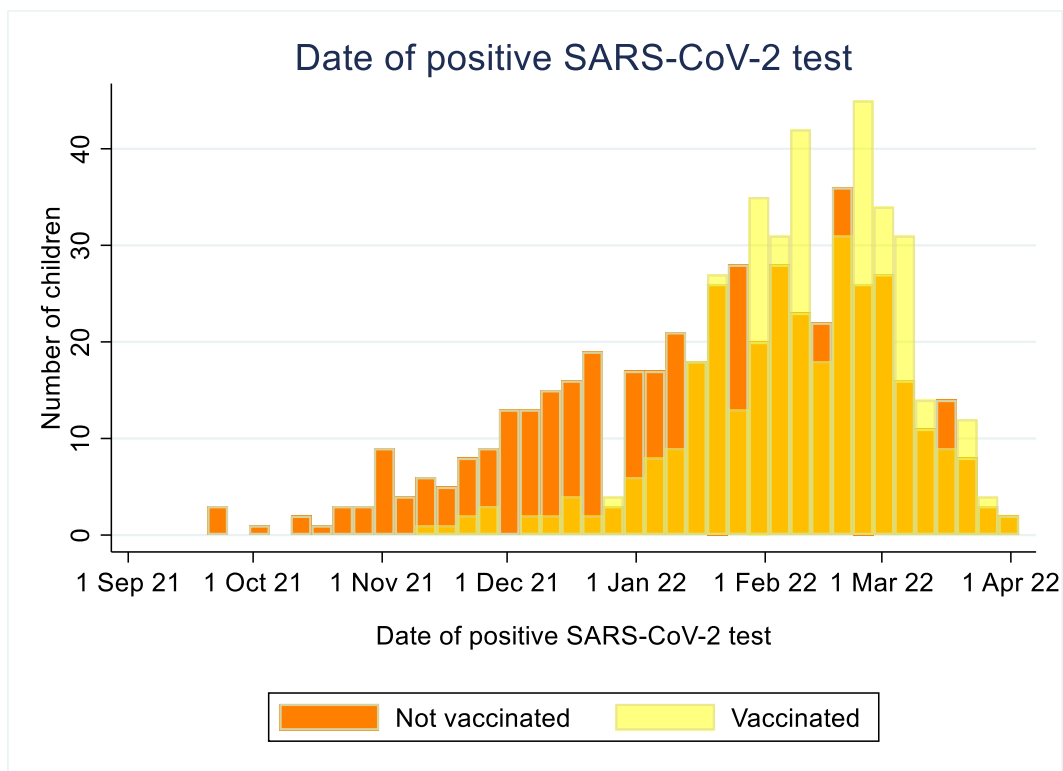

c)

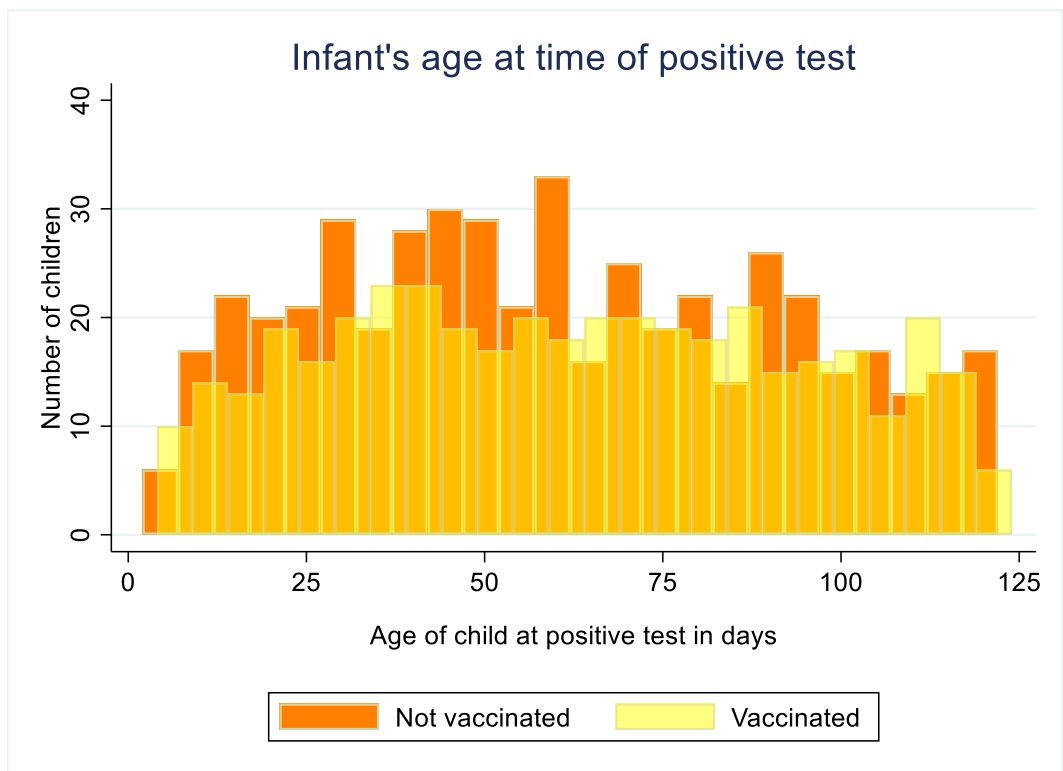

D)

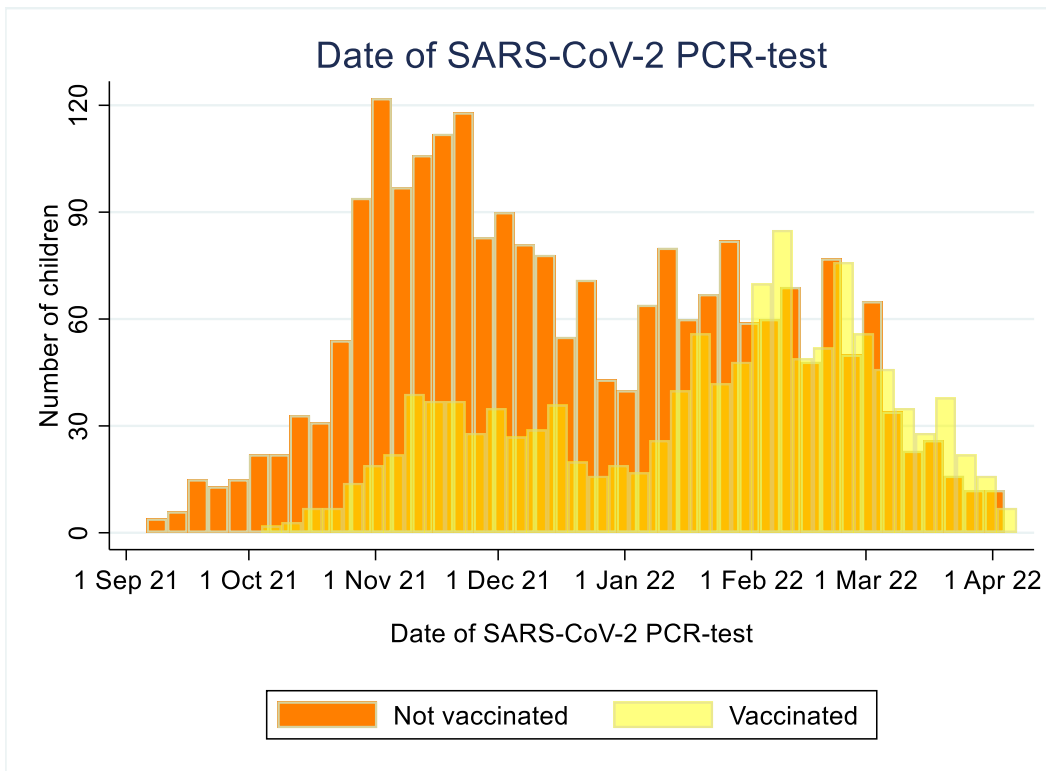

**eFigure 2: Cumulative proportion of infants with a positive SARS-CoV-2 PCR-test by maternal vaccination status, using infant age as time axis**

(A) Delta-dominated period: September 1 to December 31, 2021, and (B) Omicron-dominated period: January 1, to April 4, 2022.

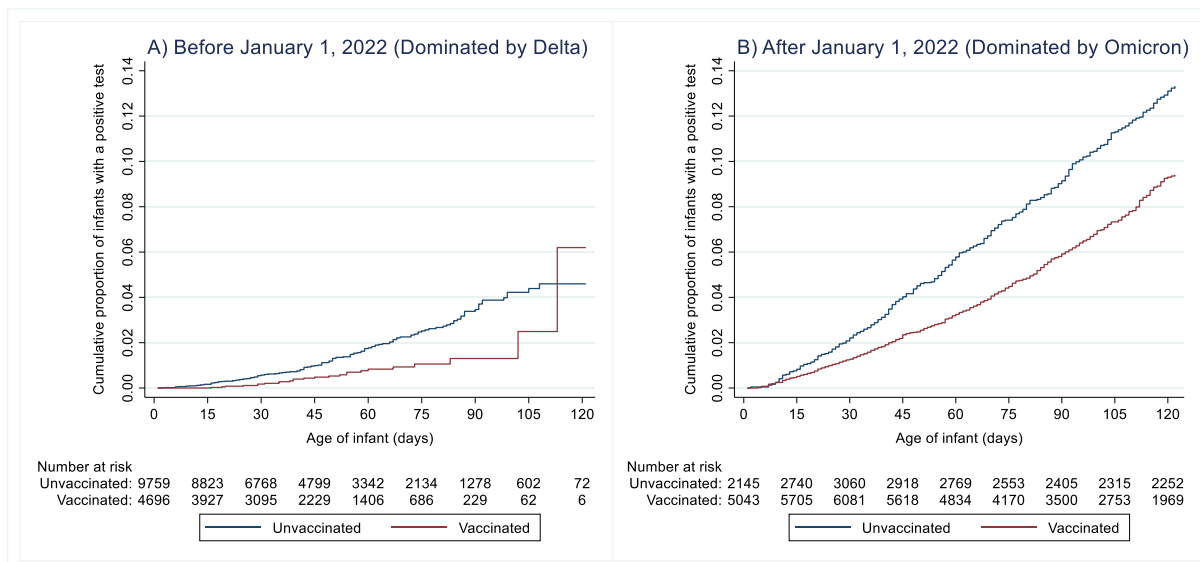

**eFigure 3: Distribution of calendar time for date of last vaccine dose in pregnancy according to maternal vaccination status**

A) Second or third dose in pregnancy, B) One vaccine dose during pregnancy

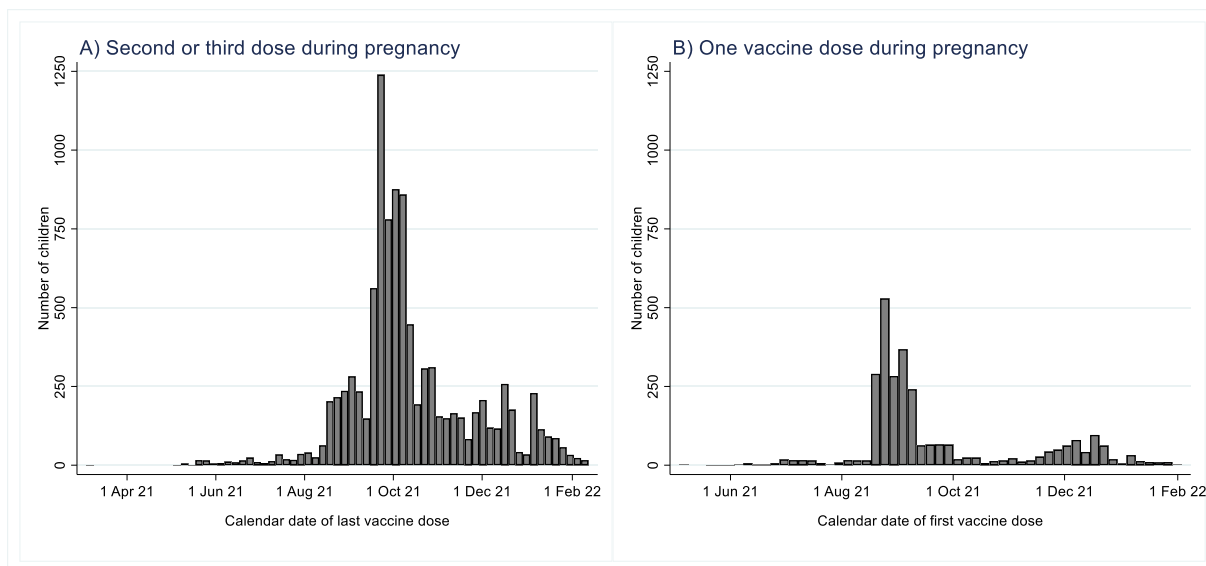



**eFigure 4: Distribution of time between birth and last vaccine dose in pregnancy according to maternal vaccination status**

A) Second or third dose in pregnancy, B) One vaccine dose during pregnancy

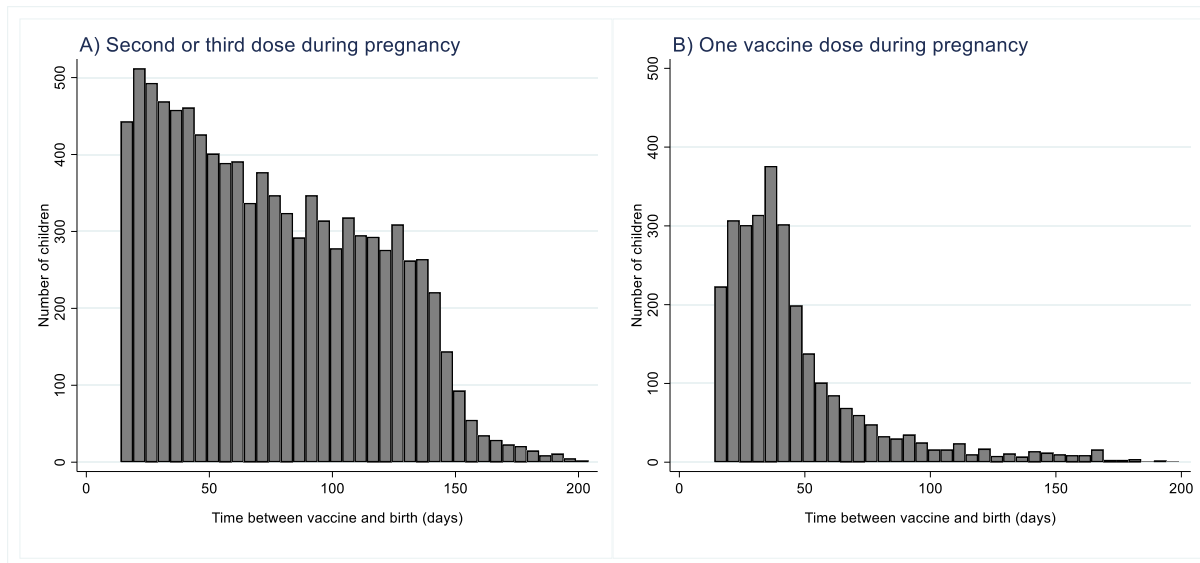

Supplement: jamainternmed-e222442-s001.pdf [file jamainternmed-e222442-s001.pdf]
